# Supplementary material for: Synthesis and biological evaluation of thiazolidinedione derivatives with high ligand efficiency to P. aeruginosa PhzS
Source: PubMed Central journal article supplement (PMC8186431; doi:10.1080/14756366.2021.1931165), 2021-06-03
Supplement: IENZ_A_1931165_SM8475.pdf [file IENZ_A_1931165_SM8475.pdf]

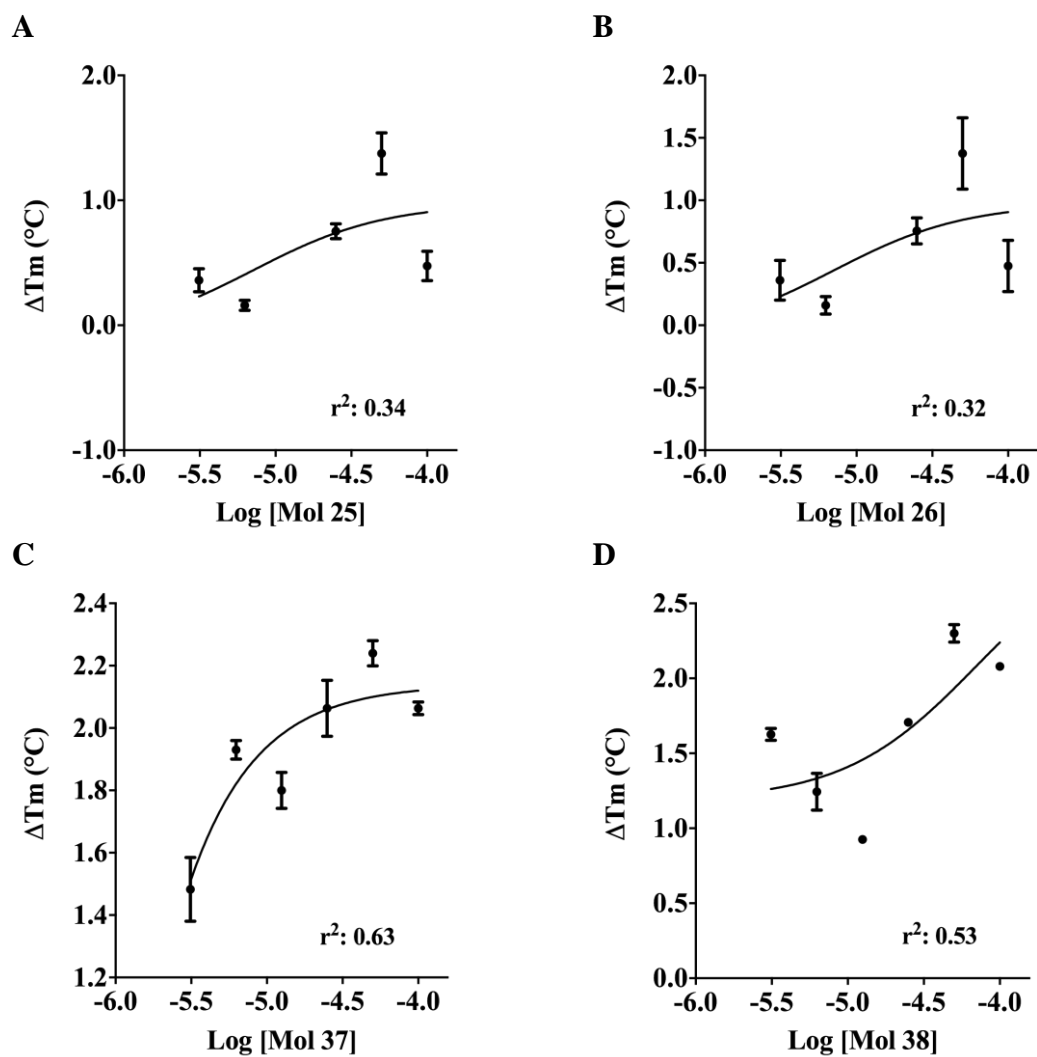

**Figure 1S.** Effect of different concentrations of compounds **25**, **26**, **37** and **38** over the *PaPhzS*  $T_m$  values. Graphs were generated with GraphPad Prism v.8.0.

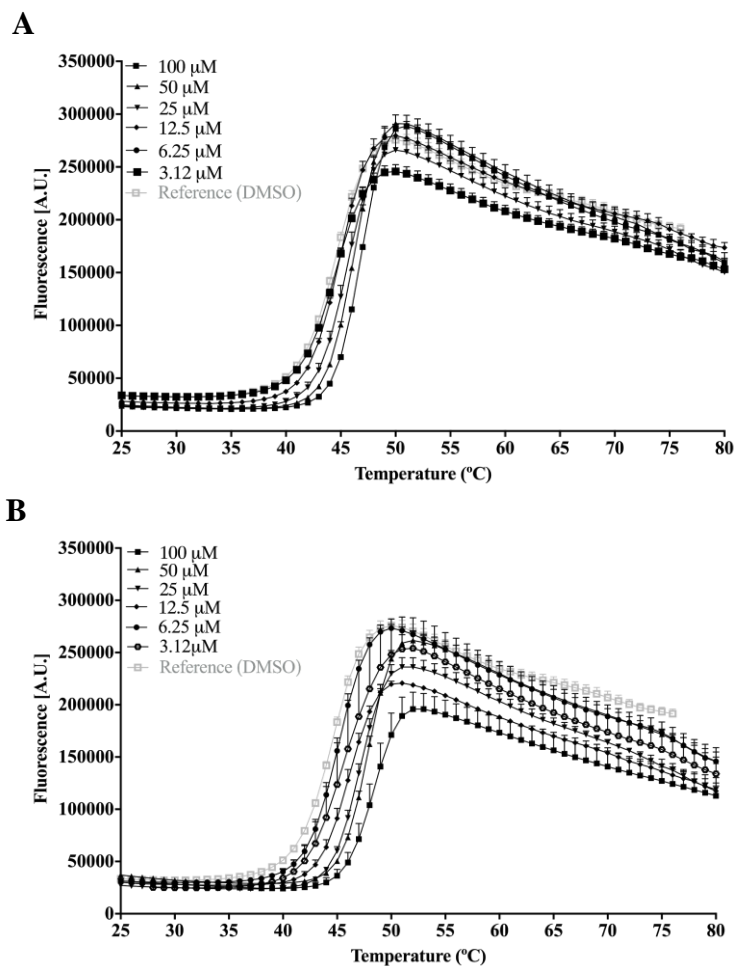

**Figure 2S.** Raw data from concentration-response curves obtained from TSA (A) Compound 13 (B) Compound 15.

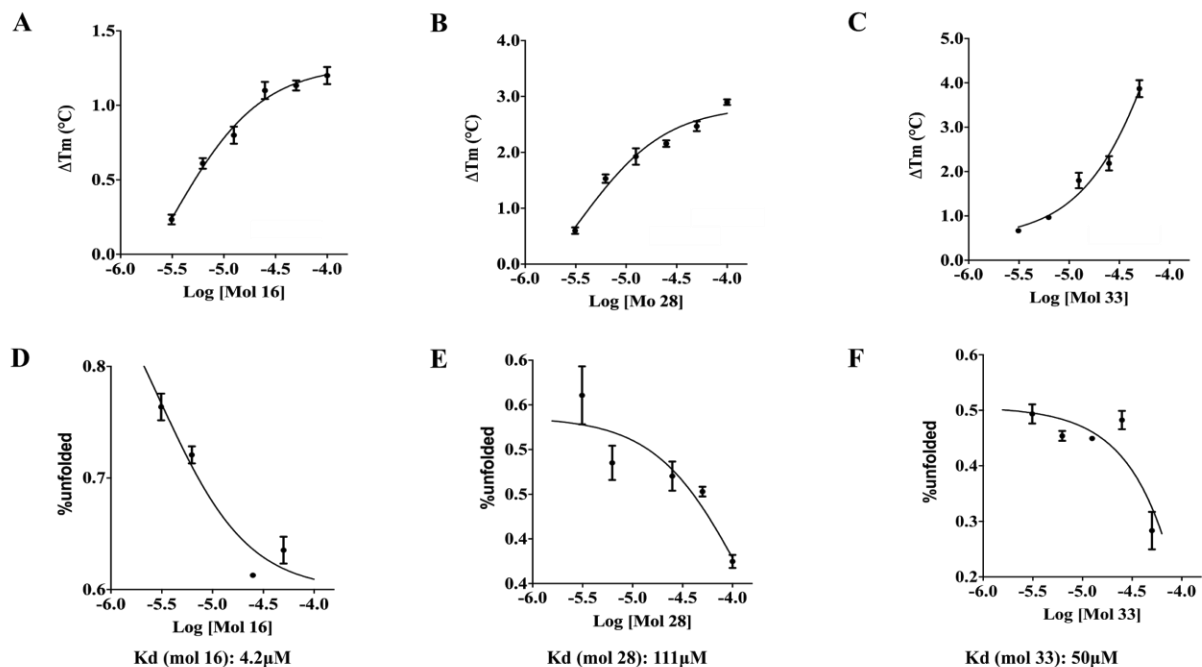

**Figure 3S.** Effect of different concentrations of compounds **16**, **28** and **33** over the *PaPhzS*  $T_m$  values (upper panel – A-C) and over the fraction on unfolded *PaPhzS* (lower panel –D-F) at 43°C.  $\Delta T_m$  was calculated in comparison to DMSO (control) and  $K_d$  values were calculated using DSFit software. Plots were generated with GraphPad Prism v.8.0. All data represent the mean  $\pm$  SD from three independent experiments.
